# Supplementary material for: Estimation of Natural Radioactivity in Underground Water Sources for Personal Use in Zhytomyr City and Its Suburbs
Source: Research Square preprint supplement (doi:10.21203/rs.3.rs-7408436/v1), 2025-09-03
Supplement: Supplementary file 1 [file 88d379718373e037bb9c13e5.xlsx]

## Sheet: S.1
Table S.1. Radionuclide activity concentration data (Bq/L) and annual lifetime average dose from radionuclides: (Ra226+Ra228+∑U) and Ra228 in water, mSv
N	Rn222	Ra226	Ra228	∑U	Total dose	Ra228 dose
1	234	0.78	0.5	0.019	0.663	0.452
2	440	0.33	0.35	0.11	0.4093	0.3164
3	260	0.23	0.2	0.096	0.2463	0.1808
4	330	3.1	0.23	0.1	1.0476	0.2079
5	175	0.1	0.05	0.028	0.0732	0.0452
6	65	0.21	0.075	0.018	0.1251	0.0678
7	110	0.21	0.15	0.07	0.1947	0.1356
8	470	0.027	0.03	0.51	0.0527	0.0271
9	160	0.14	0.07	0.31	0.1122	0.0633
10	9.6	0.011	0.011	0.002	0.013	0.0099
11	26	0.012	0.012	0.002	0.0142	0.0108
12	210	0.005	0.003	0.02	0.0048	0.0027
13	420	0.12	0.11	0.01	0.1322	0.0994
14	185	0.25	0.12	0.02	0.1766	0.1085
15	71	0.053	0.04	0.18	0.0569	0.0362
16	72	0.073	0.093	0.005	0.1039	0.0841
17	225	0.24	0.13	0.011	0.1826	0.1175
18	235	1.42	0.44	0.007	0.781	0.3977
19	240	0.23	0.24	0.012	0.2794	0.2169
20	200	0.09	0.03	0.007	0.0516	0.0271
21	200	0.048	0.04	0.068	0.0515	0.0362
22	425	0.05	0.04	0.011	0.05	0.0362
23	10	0.005	0.01	0.08	0.0133	0.009
24	70	0.045	0.089	0.28	0.1027	0.0805
25	285	0.5	0.31	0.5	0.4331	0.2802
26	200	0.29	0.24	0.16	0.3009	0.2169
27	285	0.13	0.13	0.69	0.1774	0.1175
28	120	0.41	0.4	0.008	0.4724	0.3616
29	420	0.38	0.27	0.017	0.3472	0.2441
30	260	0.09	0.03	0.021	0.0521	0.0271
31	110	0.17	0.12	0.14	0.1594	0.1085
32	82	0.047	0.025	0.068	0.0377	0.0226
33	220	0.05	0.025	0.006	0.0363	0.0226
34	240	1.1	0.38	0.065	0.6425	0.3435
35	120	0.049	0.021	0.012	0.0326	0.019
36	120	0.3	0.45	0.31	0.4988	0.4068
37	145	0.033	0.28	0.032	0.2632	0.2531
38	250	0.022	0.003	0.014	0.0091	0.0027
39	50	0.054	0.023	0.01	0.0357	0.0208
40	55	0.03	0.027	0.017	0.0331	0.0244
41	170	0.17	0.11	0.03	0.1464	0.0994
42	900	0.63	0.11	2	0.3413	0.0994
43	265	0.165	0.018	0.003	0.0609	0.0163
44	1600	4.54	0.094	0.014	1.3099	0.085
45	65	0.077	0.065	0.015	0.0801	0.0588
46	250	0.55	0.29	0.27	0.4202	0.2621
47	285	0.13	0.065	0.69	0.1186	0.0588
48	235	0.66	0.38	0.065	0.5238	0.3435
49	120	0.3	0.45	0.27	0.4974	0.4068
	238.665	0.380735	0.150592	0.151082	0.244243	0.136129	Mean
	250.509	0.784637	0.146324	0.319666	0.278174	0.13227	SD
	200	0.14	0.094	0.028	0.1322	0.085	median
	163.852	0.133794	0.0802255	0.0400995	0.123767	0.0724971	geom.mean
	9.6	0.005	0.003	0.002	0.0048	0.0027	min
	1600	4.54	0.5	2	1.3099	0.452	max
